# Supplementary material
Source: publisher site journal article supplement (https://en-cdn.bio-protocol.org/attached/file/20191231/3498%20Supplemental%20file%201%20Laser%20Scan.docx)

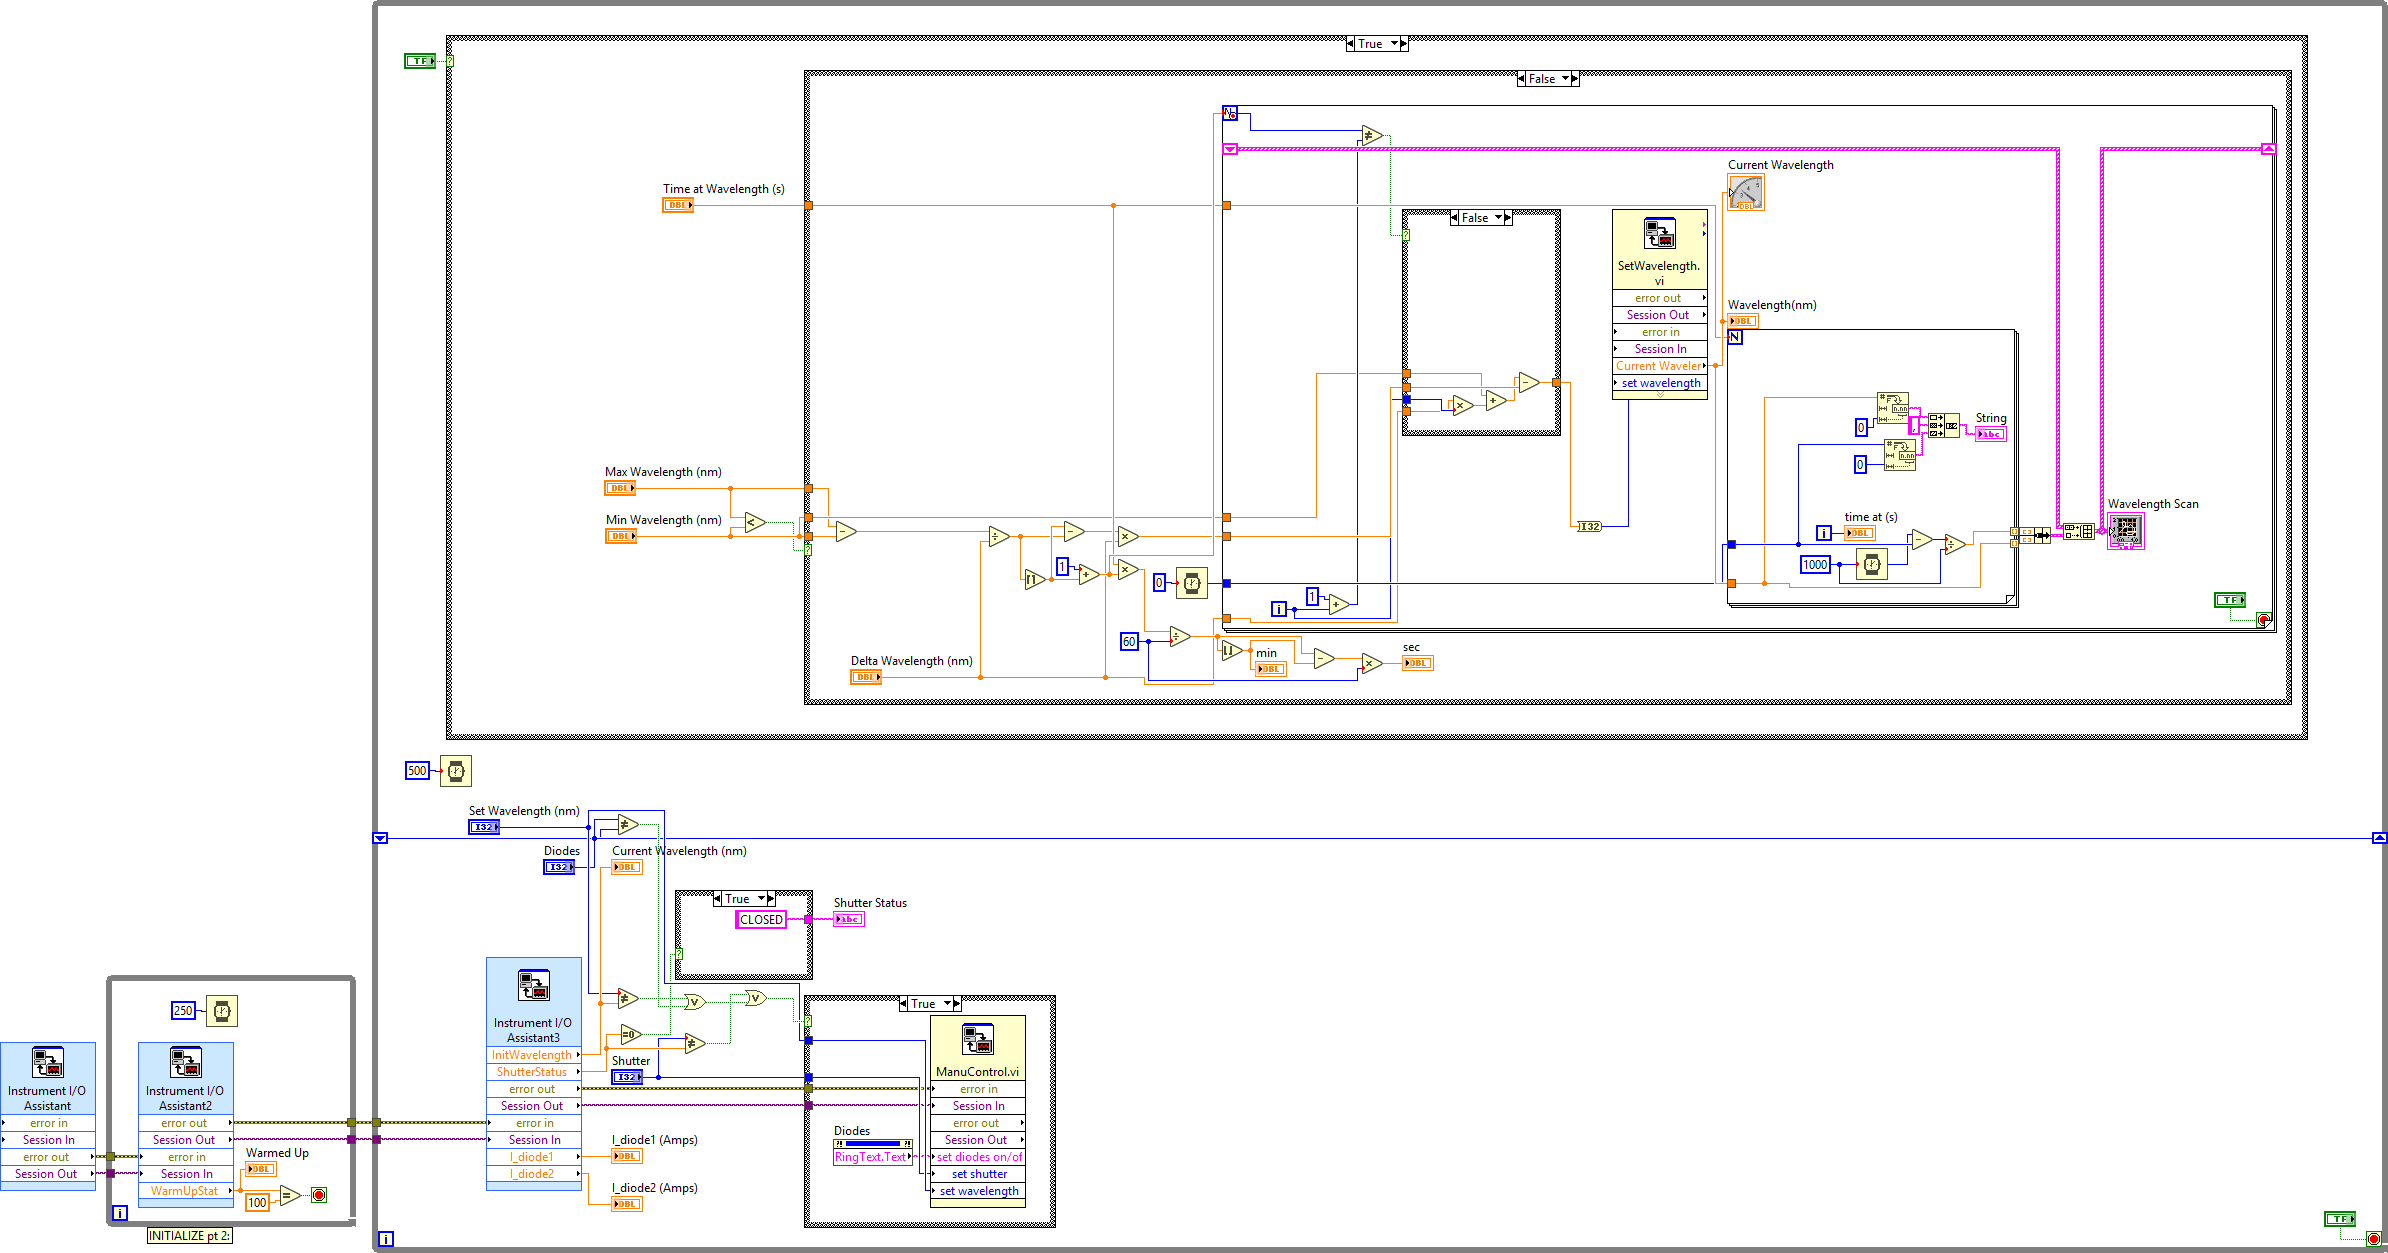

Supplement: Supplementary file 1 [file 3498%20Supplemental%20file%201%20Laser%20Scan.docx]
